# Supplementary material for: Atmospheric processes affecting the separation of volcanic ash and SO 2 in volcanic eruptions: inferences from the May 2011 Grímsvötn eruption
Source: Copernicus journal article supplement (doi:10.5194/acp-17-10709-2017), 2017-09-12
Supplement: Supplementary file 1 [file acp-17-10709-2017-supplement.zip]

Archive with 3 entries (3 files):
- acp-17-10709-2017-supplement-title-page.pdf
- SupplementaryMaterial2.pdf
- SupplementaryMaterial1.pdf
