# Supplementary material for: Atmospheric processes affecting the separation of volcanic ash and SO 2 in volcanic eruptions: inferences from the May 2011 Grímsvötn eruption
Source: Copernicus journal article supplement (doi:10.5194/acp-17-10709-2017), 2017-09-12
Supplement: Supplementary file 1 [file acp-17-10709-2017-supplement.zip › acp-17-10709-2017-supplement-title-page.pdf]

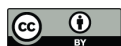

*Supplement of*

**Atmospheric processes affecting the separation of volcanic ash and SO<sub>2</sub> in volcanic eruptions: inferences from the May 2011 Grímsvötn eruption**

**Fred Prata et al.**

*Correspondence to:* Fred Prata ([fred\\_prata@hotmail.com](mailto:fred_prata@hotmail.com))

- [acp-17-10709-2017-supplement-title-page.pdf](#)
- [SupplementaryMaterial1.pdf](#)
- [SupplementaryMaterial2.pdf](#)

The copyright of individual parts of the supplement might differ from the CC BY 3.0 License.
